# Supplementary material for: Twelve Weeks of Medium-Intensity Exercise Therapy Affects the Lipoprotein Profile of Multiple Sclerosis Patients
Source: PubMed Central journal article supplement (PMC5796142; doi:10.3390/ijms19010193), 2018-01-08
Supplement: ijms-19-00193-s001.pdf [file ijms-19-00193-s001.pdf]

Supplemental Table S1: MS patient therapies

|                                | RRMS ( <i>n</i> ) | Progressive MS ( <i>n</i> ) |
|--------------------------------|-------------------|-----------------------------|
| No treatment                   | 5                 | 2                           |
| Interferon $\beta$ (Rebif®)    | 16                | 8                           |
| Glatiramer acetate (Copaxone®) | 1                 | 2                           |
| Fingolimod (Gilenya®)          | 4                 | 1                           |
| Natalizumab (Tysabri®)         | 7                 | 2                           |
| Alemtuzumab (Campath®)         | 1                 | 2                           |

Supplemental Table S2: MS patient disease types per training group

| MS TYPE | MIT ( <i>n</i> =21) |            | HIT ( <i>n</i> =20) |            |
|---------|---------------------|------------|---------------------|------------|
|         | MALE (n)            | FEMALE (n) | MALE (n)            | FEMALE (n) |
| RRMS    | 4                   | 6          | 7                   | 9          |
| SPMS    | 5                   | 5          | 2                   | 2          |
| PPMS    | 1                   | 0          | 0                   | 0          |
